# Supplementary material
Source: MDPI journal article supplement (https://www.mdpi.com/2311-7524/9/9/981)
Supplement: s1 [file s1]

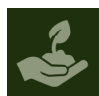

Supplementary Figures

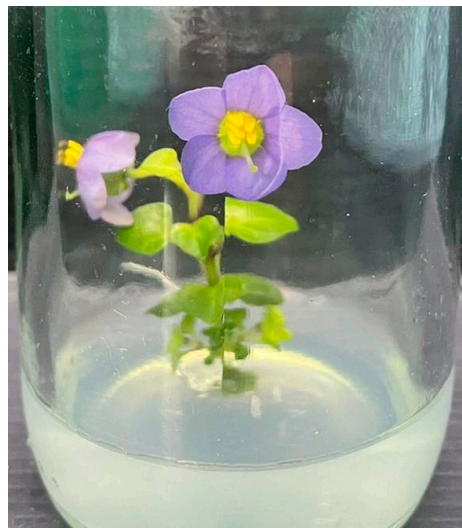

**Figure S1.** Persian violet flowers grown in the in vitro environment

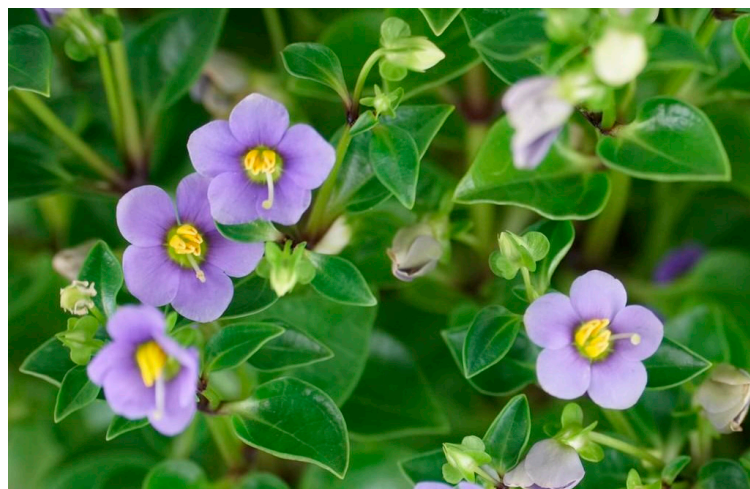

**Figure S2.** Persian violet flowers grown in the in vivo environment.
